## ERRATUM

**Oskar anchoring restricts pole plasm to the posterior of the *Drosophila* oocyte**Vanzo, N. F. and Ephrussi, A. *Development* **129**, 3705-3714.

The reproduction of Fig. 6 in this article was inaccurate. The correct version of the figure is given below. We apologise to the authors and readers for the mistake.

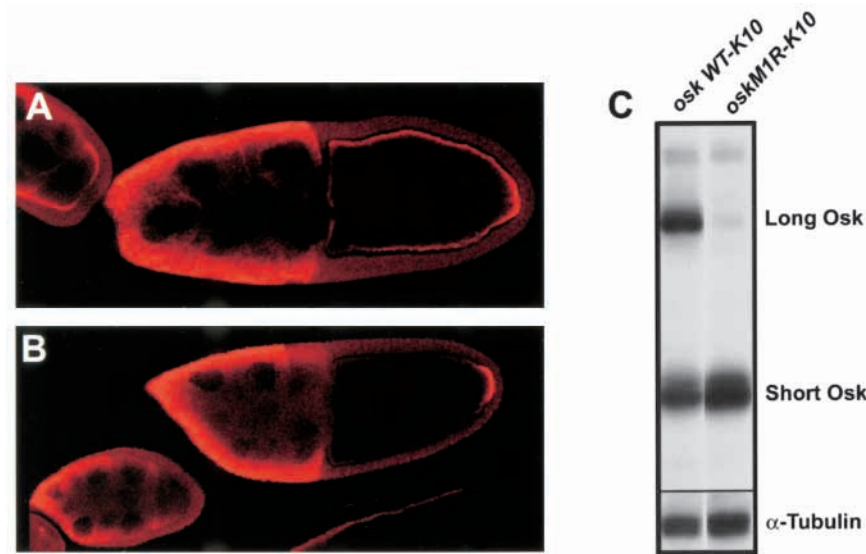

Source: https://cob.silverchair.com/dev/article-pdf/129/23/5551/1141389/5551.pdf
